# Supplementary material for: Deltaproteobacteria and Spirochaetes-Like Bacteria Are Abundant Putative Mercury Methylators in Oxygen-Deficient Water and Marine Particles in the Baltic Sea
Source: Front Microbiol. 2020 Sep 22;11:574080. doi: 10.3389/fmicb.2020.574080 (PMC7536318; doi:10.3389/fmicb.2020.574080)
Supplement: DATASHEET S3 — Amino acid sequences of hgcAB-like genes detected in BARM dataset. [file Table_3.XLSX]

## Sheet: Datasheet_S3
>BARM-01_hgcAB
----------------------------------------------MPRFVPPLLAVLATLLGLAGLWTGAEPIASHAPWLLLFGGLAMAVL-A--PTAGFLPRNTSWARASREPRPLRLSTGSWLRLPAMW----LHAFARSYAMEPGLYFTGPAYDPD-APLLVTGNYLLSVQAVVRGVAGRPVRLLLVDTDGINVWCASGKGRFSAELIVRELSR-Y-DDALLGERPRLVLPKLGLSGVKL-QTLRALGMNP
>BARM-02_hgcAB
----------------------------------------------------------------------------------------------------------------------------------------------------------------------------------------------LDTDGVNVWCAAGKGTFGTEELIHRI-EKS-GLTGVVSHRELILPQLGAPGVAAHVVRKESGFKVIYGPILSKDLPAFLDAGHKATPEMRRKKFTLGERVVLIPVEL-----------------------------VSALKWSLI--------------IAVLFFLMAGCKAGGSFFTNMINHGFFSLL--------------------…
>BARM-03_hgcAB
--------------------------MADPKQSDSCCSPSDGLLQITPCCGGSSEEPPLERFEMDAGWIDGSVTTAVGQIPRARS-----TL-GLSDRLG--------------------------TWRVRW-----AVGRMRYSIPSGLYAVGNP-SAD-SPVLVSANYKMSFDRLRRQLVGIDAWVLVLDTGGINVWCAAGKGTFGTDELVRCVDR-A-RLDEIVSHRTLVVPQLGGPGVAAHLVKKRCGFRV
>BARM-04_hgcAB
MDKIKGGGSNESPTKKNLKISTFDVKIMSSMDEIALSGSAELPNPLAGYEKPGYKMCSYVDKFIKTDAGVIPIIK---------S-----KL-GKDDLFS--------------------------TFYVRC-----GIKRNKYMVAPGLYGIGKP-DKD-SEVLVTANFKLTFDHLRKQLDDINAWILVLDTKGINVWCAAGKGTFSTLELVRKI-KNC-NLEKIVDHKRVIVPQLGATGVAARDVKKLSGFRVIYGPIRAADIPAFLKNKRKADKSMRQVTFSLYERFILTPVEI-----------------------------R-------I--------------VLKPAL-----------------------ITALALFIISGFGPGIFSFSS…
>BARM-05_hgcAB
------------------------------------------------MSAPCCCGKSPEPSCCPSASPEVRVLT---------P-----DW-SLADTWG--------------------------MISVRL-----GSCRMTYGVEPGLYAMGVP-AAD-SPVLVTANYKLTVDVLRRELGGRDLWILVLDTANVNVWCAAGKGTFGTAELVQRI-AVT-ELAKRVAHRRLILPQLGAPGVAAHEVEKESGFEV
>BARM-06_hgcAB
---------------------------------------MKNEDRCEPNEKASACCCSPSDAATQNSSDAGGKGA---------TGTVTSSL-TLGDHLG--------------------------AWKVRW-----SIGRANYKVVPGLYALGNP-GPD-SPVLTSANYKLSFDVLRSSLPGIDAWLLVLDTKGINVWCAAGKGTFGTAELVKRI-AVT-GLADVVSHREVVVPQLGAPGVAAHEVLKGSGFRV
>BARM-07_hgcAB
---------------------------------------------------------------------------------------------------------------------------------------------------------------E-----------------------RNVRLLVVDTDGINVWCAAGKGQFSETVIFHQIERYGREVFTAEKWLKMILPKFSLAGIRL-KVLRENQIRP
>BARM-08_hgcAB
---------------------------------------------------------------------------------------------------------------------------------------------------------------------------------------------------------AGKGTFSTRELVKRI-KDT-SLEKVVDHKRVIVPQLGATGVSAREVKKQSGFRV
>BARM-09_hgcAB
----------------------------------------------MPRLLPPLLATIATLLGVLGLWTGVEPLAASAPWLVLFGGATLAFL-A--PTAGFLTRARSWPRASSEPQPLRLGLGAWLRVPIMW----LHAFQRSYAVEPGLYYRGTRYDPE-VPLLVTGNYLLTVLAVVRGAGGRPFRLLVVDSDGINVWCASGKGRFSAGLILAELDR-Y-PPALLGERPRIVLPKLGLSGVKL-AVLSSAGLRP
>BARM-10_hgcA
------------------------------------------------------------------------------------M----------------------------------------------------E-----YTVDPGLYGLGNP-GKS-DPVLATANYKMSFDRLRESLSGRNAWILVLDTDGINVWCAAGKGTFGTEELVRRI-GFS-GLDRIVDHREVILPQLSGPGVAAYQVKKLSGFKA
>BARM-11_hgcA
---------------------------------------------------------------------------------------------------------------------------------------------------------------------------------------------MVDTRGINVWCAAGKKTFTAEEVAYQV-R-SAQLDKIVSHRQLILPQLSANGVAARDLKKLCGFTG
>BARM-12_hgcA
---------------------------------MSDHKTTGCCSKPTEPGPCCCAGPQAGAGSGPPGWLDGQIATPAGDLPRART-----EW-RGADVMG--------------------------AIQVRC-----NIGRLRYTVEPGLYGVGNP-DGE-SRVFVTANYKLSFDHVRRTLAGVDAWILVLDTKGINVWCAAGKGTFGTSELIRRV-AVT-HLGDVVSHRTLIVPQLGATGVSAHQVKRECGWQV
>BARM-13_hgcA
------------------------------------------------------------------MKIEIKHTS---------S-----TL-SFRDKTD--------------------------HFLARMAYKRSS-----HLVEPGLYSLGEP-DKE-SPVFVTANYTLSFDALRSSLRGLSGYILVLDTKGVNVWCAAGKKTFGTDELLSKISS-T-QLDQIVDHKKLILPQLGAPGINAHEIKKNSGFRV
>BARM-14_hgcA
-------------------------------------------------------MAQKIVNSSEIVLPDGRKIP---------QVPAELAF-A--DRLG--------------------------SWKARW-----GIGRMHYIIEPGLYAVGNP-TAE-STVLVTANYKMSFDRLRSELGGRDVWILVLDTNGINVWCAAGKGTFGTQELLRCI-E-AFDLKNIVEHRKLVLPQLGAVGVSARDVQQHSGFRV
>BARM-15_hgcA
----------------------------------------------------------------------MPRIQ---------T-----VL-NTHDHFG--------------------------TVKART-----GIARTNYKVTPGLYCVGTT-GPD-SPVLVTANYKLSVDALRKELTNLDVWILVVDTRGINVWCAAGKGTFSTEEVTYQVKR-T-RLAELVSHRELILPQLAATGVASHLLKRQCGFKG
>BARM-16_hgcA
----------------------------------MGWKIEMPDGGGLARPPEALAAPDCTPSGPEPAFATGAVETPTGRAFVVAT-----EL-TSADHIG--------------------------GWKARW-----NIGRLRYIVAPGLYAVGAP-GAD-SPVFVSANYKMSFDALRSQLSGRDGWILVIETFGINVWCAAGKGTFGTDEIVRRV-AAT-GLDHIVSHRKLIVPQLGAPGVSAHEVKAQSGFRV
>BARM-17_hgcA
----------------------------------------------------------------------MPRIQ---------T-----VL-NTHDHLG--------------------------TVKART-----GIARTNYKVTPGLYCVGTP-GLD-SSVLVTANYKLSFDALRKELTNLDVWILVVDTRGINVWCAAGKGTFSTEEVAYQVKR-T-RLAELVSHRELILPQLAATGVANHLLKRQCGFKG
>BARM-18_hgcA
------------------------------------MENQINTHESSERFSQPVSGQSPDTASVLFKFSNNPAPEENSIIRVTSS-----EL-KFSDRLG--------------------------SWKARW-----NIGRMKYSVEPGLYSLGNPTG-K-SNVFVSANYKMSFDRLRSQLGGRDCWILVLDTKGINVWCAAGKGTFGTFELVNRI-RIV-ELQNRVSHRKLILPQLGAPGVSAHEVKLASGFTV
>BARM-19_hgcA
--------------------------------------------MKQTESSKCNCTCGATRSTPVAKWLVGKLHTDAGDVPRVST-----KL-HLRDRLG--------------------------WLRVRC-----GIGRYSFRVSPGLYAVGSPSG-S-SNVFVTANYKMSFDKLRCALSDQNAWILVLDTKGINVWCAAGKGTFGTNELVERV-KAS-GLDKILDHRRLILPQLGASGVSAHRVSEELGFKV
>BARM-20_hgcA
-------------------------MGWKIEMPDGGGLARPPGCGAAPDCSPSGPEPAFVTGGVSTPTGRAFVVA---------T-----AL-SSADRVG--------------------------GWKARW-----NIGRLRYIVAPGLYAVGAP-TPE-SPVFVSANYKMSFDALRTALSGRDGWILVIDTRGINVWCAAGKGTFGTAEIVGRVAA-T-GLDQVVSHRRLILPQLGAPGVSAHEVKAQSGFRV
>BARM-21_hgcA
MNQLTRWVELAVAAGWLAVGVAGLLDPQGAFGEYVLLPLLLGGASLFLLALATTTRPAGSPWPEGDGRPMALRLR---------------GV----DHLK--------------------------ALICWI-----HAFKRTYAVQPGLYFTGETYERD-LPLLVTANYHLSVYSLLRELGATPVRLLVVDTDGINVWCAAGKGVFSNEAINKQLRRYDRDLLSGGKWTDLVLPKFAMAGVDLRGLRAEK-INAVIGPLYAKDLPAWLRQ-----PRLRDCD--------------------------------------------------------------------------------------------------------------------…
>BARM-22_hgcA
------------------------------------MKAKSNCCCCGTKSGEEQGCAPAAPLPPPESWQTGTRETEEGPIPQIAD-----TL-DAADRRG--------------------------AIRVRM-----GIGRDRYRVEPGLYALGSP-NAN-SPVFVTANYKLSFDHLRSALYGRTGWILVLDTAGINVWCAAGKGSFGTEELVHRV-KAT-DLASILGHRQLIVPQLGATGVAAHLVTKASGFDV
>BARM-23_hgcB
---------------------------------------------------------------------------------------------------------------------------------------------------------------------------------------------------------------------------------------------------------------
>BARM-24_hgcB
-------------------------------------------------------------------METLTPER---------S-----DL---TEQTT--------------------------SCCC-------G-----GDSTPAQETTSCC-GGS-APVEEASS------------------------------CCGGSATLATDEFITH----------------------------------------
>BARM-25_hgcB
--------------------------------------------------------------------------------------------------------------------------------MIRL-------------------------E-N-----------------------------------------------------------------------------------------------
